# Supplementary material for: Pilon: An Integrated Tool for Comprehensive Microbial Variant Detection and Genome Assembly Improvement
Source: PubMed Central journal article supplement (PMC4237348; doi:10.1371/journal.pone.0112963), 2014-11-19
Supplement: pone.0112963.s001.pdf [file pone.0112963.s001.pdf]

### Supplemental Figure 1: Muscle alignment of TB F11 gene TFBG\_12611

Muscle alignment of a fraction of the *M. tuberculosis* F11 gene TFBG\_12611, from reference coordinate 2,935,888 to 2,936,368, demonstrating that the draft assembly contained a small collapse of sequence while the Pilon-improved assembly corrected the sequence. The top line in each row represents the draft assembly, the second line is the Pilon improved version of the assembly. The dashes in rows four and five indicate the sequence that was missing in the draft assembly. It is important to note that this gene did not span a gap in the draft assembly and that it was contiguous collapsed sequence.

```
TBFG_12611_Draft      AGCGCCCTGATCGGCTACGCCAGGGCGGGCTCCGGCGGGCTCGGGCGGCTTCGGCGAAAGT
TBFG_12611_PilonImproved  AGCGCCCTGATCGGCTACGCCAGGGCGGGCTCCGGCGGGCTCGGGCGGCTTCGGCGAAAGT

TBFG_12611_Draft      ACCGGCGGGCAGCGGCGGGCTGGGCGGGCGCCGGCGCTGTGCTCATCGGCACGGGCGTCGGC
TBFG_12611_PilonImproved  ACCGGCGGGCAGCGGCGGGCTGGGCGGGCGCCGGCGCTGTGCTCATCGGCACGGGCGTCGGC

TBFG_12611_Draft      GGTTCGGCGGGCTCGGTGGCGGGCTCCAACGGCACCGGGGGCGGGCGGGCGGGCGGGC
TBFG_12611_PilonImproved  GGTTCGGCGGGCTCGGTGGCGGGCTCCAACGGCACCGGGGGCGGGCGGGCGGGCGGGC

TBFG_12611_Draft      ACGGGCGCCA-----
TBFG_12611_PilonImproved  ACGGGCGCCACGCTGATCGGCCTGGGCGCCGGGGCGGGCGGGCGGCATCGGGCGGTTCCGCC

TBFG_12611_Draft      -----CGCTG
TBFG_12611_PilonImproved  GTCAACGTGGGCAACGGCGTCGGCGGTCTGGGCGGCCAGGGCGGGCAGGGCGCCGCGCTG

TBFG_12611_Draft      ATCGGCCTGGGCGCCGGCGGTGCCGGCGGTGCCGGCGGGCGCCACAGTCGTTGGACTTGGT
TBFG_12611_PilonImproved  ATCGGCCTGGGCGCCGGCGGTGCCGGCGGTGCCGGCGGGCGCCACAGTCGTTGGACTTGGT

TBFG_12611_Draft      GGCAATGGCGGTGACGGCGGTGACGGTGGCGGCCTGTTTAGTATCGGCCTCGGTGGGGAC
TBFG_12611_PilonImproved  GGCAATGGCGGTGACGGCGGTGACGGTGGCGGCCTGTTTAGTATCGGCCTCGGTGGGGAC

TBFG_12611_Draft      GGCGGCAACGCCGGCAACGGCGCCATGCCATGGCGGCAACGGCGGCAACGCCGGG
TBFG_12611_PilonImproved  GGCGGCAACGCCGGCAACGGCGCCATGCCATGGCGGCAACGGCGGCAACGCCGGG
```
