# Supplementary material for: Pilon: An Integrated Tool for Comprehensive Microbial Variant Detection and Genome Assembly Improvement
Source: PubMed Central journal article supplement (PMC4237348; doi:10.1371/journal.pone.0112963), 2014-11-19

## Supplemental Figure 2: Contig count reduction in production

In a set of 50 Carbapenem-susceptible *Enterobacteriaceae* genomes Pilon reduced the average number of contigs by 42% compared to assemblies prior to running Pilon. The plot shows the distribution of contig counts before (blue) and after (red) running Pilon on 50 samples which are organized along the x-axis. The number of contigs ranges (y-axis) from just above 70 (left-side) to below 10 (right-side).

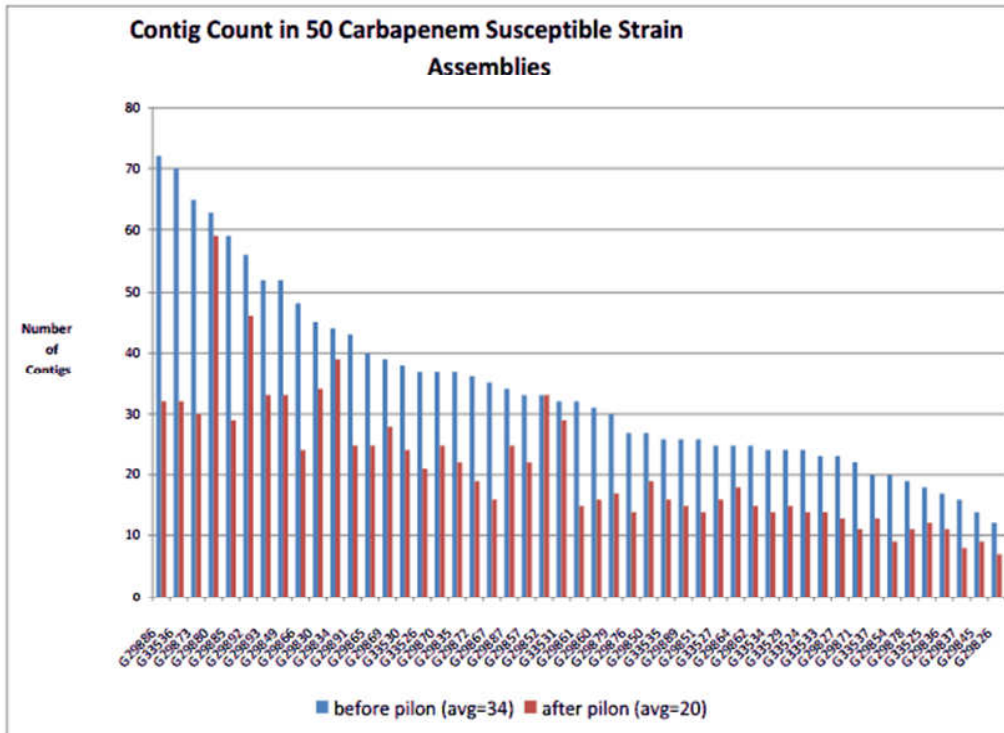

Supplement: pone.0112963.s002.pdf [file pone.0112963.s002.pdf]
