# Supplementary material for: Pilon: An Integrated Tool for Comprehensive Microbial Variant Detection and Genome Assembly Improvement
Source: PubMed Central journal article supplement (PMC4237348; doi:10.1371/journal.pone.0112963), 2014-11-19
Supplement: pone.0112963.s005.pdf [file pone.0112963.s005.pdf]

**Supplemental Table 2:** Assessment of base corrections by Pilon and iCORN. All 47 non-ambiguous small corrections applied by Pilon were correct, whereas 35 of 49 corrections by iCORN were correct.

|                      | <b>Pilon</b> |           |              |           | <b>iCORN</b> |           |              |           |
|----------------------|--------------|-----------|--------------|-----------|--------------|-----------|--------------|-----------|
|                      | <b>F11</b>   |           | <b>TIGR4</b> |           | <b>F11</b>   |           | <b>TIGR4</b> |           |
| <b>Small changes</b> | Correct      | Incorrect | Correct      | Incorrect | Correct      | Incorrect | Correct      | Incorrect |
| <b>SNPs</b>          | 17           | 0         | 26           | 0         | 14           | 12        | 19           | 2         |
| <b>Indels</b>        | 3            | 0         | 1            | 0         | 2            | 0         | 0            | 0         |
| <b>Total fixes</b>   | 20           | 0         | 27           | 0         | 16           | 12        | 19           | 2         |
