# Supplementary material for: Pilon: An Integrated Tool for Comprehensive Microbial Variant Detection and Genome Assembly Improvement
Source: PubMed Central journal article supplement (PMC4237348; doi:10.1371/journal.pone.0112963), 2014-11-19
Supplement: pone.0112963.s008.pdf [file pone.0112963.s008.pdf]

**Supplemental Table 5: Summary of SNP, small in-dels, and large in-dels in *M. tuberculosis* F11 relative to H37Rv.**

Large events are all variants that have an *SVTYPE* annotation in the VCF file. First column is the type of the event in the regular Pilon run, the second column the type of the event in the Pilon-frags run and the third column is the tally of how often the combination from the first and second column occurred.

| Pilon                    | Pilon-frags        | Count |
|--------------------------|--------------------|-------|
| SNP                      | SNP                | 871   |
| SNP                      | Amb / LowCov / Del | 14    |
| Amb / LowCov / Del       | SNP                | 23    |
| SNP                      | REF                | 6     |
| REF                      | SNP                | 1     |
| Total SNPs found         |                    | 915   |
|                          |                    |       |
| Pilon                    | Pilon-frags        | Count |
| Indel                    | Indel              | 56    |
| Del                      | Indel              | 2     |
| LowCov                   | Indel              | 1     |
| REF                      | Indel              | 1     |
| Total small indels found |                    | 60    |
|                          |                    |       |
| Pilon                    | Pilon-frags        | Count |
| Large Indel              | Large Indel        | 73    |
| Large Indel              | -                  | 6     |
| -                        | Large Indel        | 14    |
| Total large indels found |                    | 93    |

**Legend:**

Pilon: Pilon call from small (frags) and large (jump) insert libraries from *M. tuberculosis* F11.

Pilon-frags: Pilon output from only small (frags) insert library from *M. tuberculosis* F11.

REF: This base agrees with the reference.

Amb: Ambiguous; significant evidence for more than one allele at this position.

LowCov: Valid read coverage less than the threshold controlled by the --mindepth argument .

Del: This base is in a deletion or change event from another record.
