# Supplementary material for: Pilon: An Integrated Tool for Comprehensive Microbial Variant Detection and Genome Assembly Improvement
Source: PLoS One. 2014 Nov 19;9(11):e112963. doi: 10.1371/journal.pone.0112963 (PMC4237348; doi:10.1371/journal.pone.0112963)
Supplement: Table S3 — Detailed information regarding the gene based assessment of F11 assemblies. (XLSX) [file pone.0112963.s006.xlsx]

## Sheet: Sheet1
Table S3: detailed information regarding the gene based assessment of F11 assemblies
Draft Coord	Pilon Coord	Draft Seq	Pilon Seq	Event	Ref Coord	Assessment	Notes	gene loci	gene names	ref range
scaffold00001:36376	scaffold00001_pilon:36376	C	G	SNP	-3907031	Correct	Perfect	TBFG_13513	PPE family protein	3907031
scaffold00001:82428-93547	scaffold00001_pilon:82428-82703	NNNNNNNNNNNNNNNNNNNNNNNNNNNNNNNNNNNNNNNNNNNNNNNNNNNNNNNNNNNNNNNNNNNNNNNNNNNNNNNNNNNNNNNNNNNNNNNNNNNNNNNNNNNNNNNNNNNNNNNNNNNNNNNNNNNNNNNNNNNNNNNNNNNNNNNNNNNNNNNNNNNNNNNNNNNNNNNNNNNNNNNNNNNNNNNNNNNNNNNNNNNNNNNNNNNNNNNNNNNNNNNNNNNNNNNNNNNNNNNNNNNNNNNNNNNNNNNNNNNNNNNNNNNNNNNNNNNNNNNNNNNNNNNNNNNNNNNNNNNNNNNNNNNNNNNNNNNNNNNNNNNNNNNNNNNNNNNNNNNNNNNNNNNNNNNNNNNNNNNNNNNNNNNNNNNNNNNNNNNNNNNNNNNNNNNNNNNNNNN…	TTATACATTAGTCGCAATTGCTCGGCGGCGGCAGACAATGAGTCAGCACCCGGACCTTCATATATTATGTTGGAGATATACTCCGCTGGTATCATTGGATGCATCTGTTTGTTCTTTGCTCCTTTCGGTTGATGACGGCTGTTGTCGCGTATGGCAATGTCTGCTGTGCCGGTTTGGTCTTCAGCTAGATCAGTGCAAGGTTGTGCTGTTTTGGGCCTCGGCGAGCCGACACGCCTCGGCGTTCTCAGCTAAGCGCTGCCTAAACCATGCCTAACC	ClosedGap	-3860978	No worse	Good fill despite R flank misassembly	TBFG_13465	PPE family protein	3860703-3860978
scaffold00001:98098	scaffold00001_pilon:87254	C	T	SNP	-3853732	Correct	Perfect	TBFG_13458	hypothetical protein	3853732
scaffold00001:119994	scaffold00001_pilon:109150	C	T	SNP	-3831956	Correct	Issue with R flank	TBFG_13437	conserved hypothetical protein	3831956-3831956
scaffold00001:206663	scaffold00001_pilon:195819	T	C	SNP	-3744993	Correct	Perfect	TBFG_13376	PPE family protein	3744993
scaffold00001:227630-233009	scaffold00001_pilon:216786-216835	NNNNNNNNNNNNNNNNNNNNNNNNNNNNNNNNNNNNNNNNNNNNNNNNNNNNNNNNNNNNNNNNNNNNNNNNNNNNNNNNNNNNNNNNNNNNNNNNNNNNNNNNNNNNNNNNNNNNNNNNNNNNNNNNNNNNNNNNNNNNNNNNNNNNNNNNNNNNNNNNNNNNNNNNNNNNNNNNNNNNNNNNNNNNNNNNNNNNNNNNNNNNNNNNNNNNNNNNNNNNNNNNNNNNNNNNNNNNNNNNNNNNNNNNNNNNNNNNNNNNNNNNNNNNNNNNNNNNNNNNNNNNNNNNNNNNNNNNNNNNNNNNNNNNNNNNNNNNNNNNNNNNNNNNNNNNNNNNNNNNNNNNNNNNNNNNNNNNNNNNNNNNNNNNNNNNNNNNNNNNNNNNNNNNNNNNNNNNNNN…	TCACCTAGTGCCGGCAATACTGCTCAACGCCAACCCCAAGAGGACGGCAG	ClosedGap	-3723965	Correct	Perfect	intergenic	NO GENE {falls between transposase (TBFT_13358) and transposase (TBFT_13359)}	3723916-3723965
scaffold00001:234632-234736	scaffold00001_pilon:218458	GANNNNNNNNNNGAACTCGAGGCTGCCTACTACGCTCAACGCCAGAGACCAGCCGCCGGCTGAGGTCTCAGATCAGAGAGTCTCCGGACTCACCGGGGCGGTTCA	.	ClosedGap	-3722293	Correct	Perfect	intergenic	NO GENE {falls between pterin-4-alpha-carbinolamine dehydratase moaB3 (TBFT_13356) and transposase (TBFT_13357)}	3722293-3722293
scaffold00001:391571-392830	scaffold00001_pilon:375292-376459	NNNNNNNNNNNNNNNNNNNNNNNNNNNNNNNNNNNNNNNNNNNNNNNNNNNNNNNNNNNNNNNNNNNNNNNNNNNNNNNNNNNNNNNNNNNNNNNNNNNNNNNNNNNNNNNNNNNNNNNNNNNNNNNNNNNNNNNNNNNNNNNNNNNNNNNNNNNNNNNNNNNNNNNNNNNNNNNNNNNNNNNNNNNNNNNNNNNNNNNNNNNNNNNNNNNNNNNNNNNNNNNNNNNNNNNNNNNNNNNNNNNNNNNNNNNNNNNNNNNNNNNNNNNNNNNNNNNNNNNNNNNNNNNNNNNNNNNNNNNNNNNNNNNNNNNNNNNNNNNNNNNNNNNNNNNNNNNNNNNNNNNNNNNNNNNNNNNNNNNNNNNNNNNNNNNNNNNNNNNNNNNNNNNNNNNNNNNNNNN…	AGCGGGCGGTGCGGATGGTCGCAGAGATCCGCGGTCAGCACGATTCGGAGTGGGCAGCGATCAGTGAGGTCGCCCGTCTACTTGGTGTTGGCTGCGCGGAGACGGTGCGTAAGTGGGTGCGCCAGGCGCAGGTCGATGCCGGCGCACGGCCCGGGACCACGACCGAAGAATCCGCTGAGCTGAAGCGCTTGCGGCGGGACAACGCCGAATTGCGAAGGGCGAACGCGATTTTAAAGACCGCGTCGGCTTTCTTCGCGGCCGAGCTCGACCGGCCAGCACGCTAATTACCCGGTTCATCGCCGATCATCAGGGCCACCGCGAGGGCCCCGATGGTTTGCGGTGGGGTGTCGAGTCGATCTGCACACAGCTGACCGAGCTGGGTGTGCCGATCGCCCCATC…	ClosedGap	-3565522	Correct	Perfect	TBFG_13206 & TBFG_13207	transposase(s)	3564355-3565522
scaffold00001:822485-822741	scaffold00001_pilon:806114-806456	TTCGTCGACCATCATTGCCATTCCCTCTCCCCACGTGTCGTCAGACCCAAAACCCCGNNNNNNNNNNNNNNNNNNNNNNNNNNNNNNNNNNNNNNNNNNNNNNNNNNNNNNNNNNNNNNNNNNNNNNNNNNNNNNNNNNNNNNNNNNNNNNNNNNNNNNNNNNNNNNNNNNNNNNNNNNNNNNNNNNNNNNNNNNNNNNNNNNNNNNNNNNNNNNNNNNNNNNNNNNNNNNNNNNNNNNNNNNNNNNNNNNNNNNNN	ATGGGATATCTGCTGCCCGCCCGGGGAGATGCTGTCCGAGGTCGTCAGACCCAAAACCCCGAGAGGGGACGGAAACTTCGTCGACCATCATTGCCATTCCCTCTCCCCACGTGTCGTCAGACCCAAAACCCCGAGAGGGGACGGAAACTTGCGCCAACCCTTTCGGTGTGATGCGGATGGTCGGCTCGGGTCGTCAGACCCAAAACCCCGAGAGGGGACGGAAACCTTGAATAACGCGCAGTGAATTTCGCGGATCAGACCCAAAACCCCGAGAGGGGACGGAAACATTCNNNNNNNNNNACGCCTGACCCGACCCACCCGCCAGACCCGAGGTCACCAACCC	PartialFill	-3134509	Correct	589 L & 344 R Perfect	intergenic	NO GENE {falls between transposase (TBFT_12829) and conserved hypothetical protein (TBFT_12830)}	3134167-3134509
scaffold00001:824650-829730	scaffold00001_pilon:808365-813445	TCTTGACGATGCGGTTGCCCCGCGCCCTTTTCCAGCCGTCGTCAGACCCAAAACCCCGNNNNNNNNNNNNNNNNNNNNNNNNNNNNNNNNNNNNNNNNNNNNNNNNNNNNNNNNNNNNNNNNNNNNNNNNNNNNNNNNNNNNNNNNNNNNNNNNNNNNNNNNNNNNNNNNNNNNNNNNNNNNNNNNNNNNNNNNNNNNNNNNNNNNNNNNNNNNNNNNNNNNNNNNNNNNNNNNNNNNNNNNNNNNNNNNNNNNNNNNNNNNNNNNNNNNNNNNNNNNNNNNNNNNNNNNNNNNNNNNNNNNNNNNNNNNNNNNNNNNNNNNNNNNNNNNNNNNNNNNNNNNNNNNNNNNNNNNNNNNNNNNNNNNNNNNNNNNNNNNNNNNNNNNNNNNNNNNNNNNN…	AGGTTCGCGTCAGACAGGTTCGCGTCGATCAAGTCCGGTCGTCAGACCCAAAACCCCGAGAGGGGACGGAAACTTTATCACTCCCGACCAAATAGGTATCGGCGTGTTCAAGTCGTCAGACCCAAAACCCCGAGAGGGGACGGAAACATTTTGAGCGCGAACTCGTCCACAGTCCCCCTTTCAGGTCGTCAGACCCAAAACCCCGAGAGGGGACGGAAACGCCCCGTGGATGGCGGATGCGTTGTGCGCGCAAGTGTCGTCAGACCCAAAACCCCGAGAGGGGACGGAAACCCGACGATGGCCAGNNNNNNNNNNNNNNNNNNNNNNNNNNNNNNNNNNNNNNNNNNNNNNNNNNNNNNNNNNNNNNNNNNNNNNNNNNNNNNNNNNNNNNNNNNNNNN…	PartialFill	-3132023	Correct	L good extension despite flank issue, R perfect	intergenic	NO GENE {falls between transposase (TBFT_12826) and transposase (TBFT_12828)}	3126943-3132023
scaffold00001:1025847	scaffold00001_pilon:1009562-1009666	.	CGGCGCCCTGGCCGCCCTGGCCGCCCAGACCGCCGACGCCGTTGCCCACGTTGACGGCGAACCCGCCGATGCCGCCGCCGCCGCCGGCGCCCAGGCCGATCAGCG	BreakFix	-2936181	Correct	Perfect	TBFG_12611	PE-PGRS family protein	2936077-2936181
scaffold00001:1225902-1226006	scaffold00001_pilon:1209722-1210275	NNNNNNNNNNNNNNNNNNNNNNNNNNNNNNNNNNNNNNNNNNNNNNNNNNNNNNNNNNNNNNNNNNNNNNNNNNNNNNNNNNNNNNNNNNNNNNNNNNNNNNNNN	ATCAGCTCGATGCGATGATCGGTGCTCTCGACGAGCAGATCGAGCAGCTGATGCATCCCTTTTGTGCCCGACGCGAGCTGATTGCATCGATCCCGGGGATCGGGGTGGGTGCCTCGGCGACGGTCATCTCTGAAATCGGCGCCGACCCGGCGGCCTGGTTCCCCTCGGCTGAGCATCTGGCCTCGTGGGTGCGGCTGTGCCCGGGCAACCACGAATCGGCCGGCAAACGCCATCACGGTGCCCGCCGCACAGGCAACCAGCACCTGCAGCCGGTCCTGGTCGAGTGCGCGTGGGCCGCCGTGCGCACCGATGGCTACCTGCGCGAGTACTACCGCCGCCAGGTCCGCAAGTTCGGTGGCTTCCGCAGTCCCGCTGCCAACAAGAAGGCGATCATCGCCG…	ClosedGap	-2736320	Correct	Perfect	TBFG_12452	transposase	2735767-2736320
scaffold00001:1262828-1263982	scaffold00001_pilon:1247097-1248264	NNNNNNNNNNNNNNNNNNNNNNNNNNNNNNNNNNNNNNNNNNNNNNNNNNNNNNNNNNNNNNNNNNNNNNNNNNNNNNNNNNNNNNNNNNNNNNNNNNNNNNNNNNNNNNNNNNNNNNNNNNNNNNNNNNNNNNNNNNNNNNNNNNNNNNNNNNNNNNNNNNNNNNNNNNNNNNNNNNNNNNNNNNNNNNNNNNNNNNNNNNNNNNNNNNNNNNNNNNNNNNNNNNNNNNNNNNNNNNNNNNNNNNNNNNNNNNNNNNNNNNNNNNNNNNNNNNNNNNNNNNNNNNNNNNNNNNNNNNNNNNNNNNNNNNNNNNNNNNNNNNNNNNNNNNNNNNNNNNNNNNNNNNNNNNNNNNNNNNNNNNNNNNNNNNNNNNNNNNNNNNNNNNNNNNNNNNNNNNN…	GAGCGGGCGGTGCGGATGGTCGCAGAGATCCGCGGTCAGCACGATTCGGAGTGGGCAGCGATCAGTGAGGTCGCCCGTCTACTTGGTGTTGGCTGCGCGGAGACGGTGCGTAAGTGGGTGCGCCAGGCGCAGGTCGATGCCGGCGCACGGCCCGGGACCACGACCGAAGAATCCGCTGAGCTGAAGCGCTTGCGGCGGGACAACGCCGAATTGCGAAGGGCGAACGCGATTTTAAAGACCGCGTCGGCTTTCTTCGCGGCCGAGCTCGACCGGCCAGCACGCTAATTACCCGGTTCATCGCCGATCATCAGGGCCACCGCGAGGGCCCCGATGGTTTGCGGTGGGGTGTCGAGTCGATCTGCACACAGCTGACCGAGCTGGGTGTGCCGATCGCCCCAT…	ClosedGap	-2698588	Correct	Perfect	TBFG_12416 & TBFG_12417	transposase(s)	2697421-2698588
scaffold00001:1311817	scaffold00001_pilon:1296099	C	T	SNP	935275	Correct	Perfect	TBFG_10852	transposase	935275-935275
scaffold00001:1312655-1312964	scaffold00001_pilon:1296937-1297261	NNNNNNNNNNNNNNNNNNNNNNNNNNNNNNNNNNNNNNNNNNNNNNNNNNNNNNNNNNNNNNNNNNNNNNNNNNNNNNNNNNNNNNNNNNNNNNNNNNNNNNNNNNNNNNNNNNNNNNNNNNNNNNNNNNNNNNNNNNNNNNNNNNNNNNNNNNNNNNNNNNNNNNNNNNNNNNNNNNNNNNNNNNNNNNNNNNNNNNNNNNNNNNNNNNNNNNNNNNNNNNNNNNNNNNNNNNNNNNNNNNNNNNNNNNNNNNNNNNNNNNNNNNNNNNNNNNNNNNNNNNNNNNNNNNNNNNNNNNNNNNNNNNNNNN	GGCGAAGACCGCCACGCCGCCGTCGTCTTCGTCGACATCGTCGGCTCCACCCAGCTGGTGGACAACCAACCTGCCGCCCACGTGGTCAAGCTCCTCAACCGGTTTTTCGCGATCGTCGTCAACGAGGTCGACCGTCACCACGGACTGATCAACAAGTTCGCNNNNNNNNNNAACATCGGGTCCCTCAATTTGGGCAGCGGAAATACCGGTGACACGAACGTCGGCAGCGGCAATATCGGCAACACCAACCTAGGCGGCGGCAATATCGGCAGCTTCAACCTGGGCAGCGGTAACCAAGGTGACATCAACCTGGGCATCGGTAACG	PartialFill	-1485202	Correct	Perfect	TBFG_11346	hypothetical adenylate cyclase (ATP pyrophosphate-lyase) (adenylyl cyclase)	1484878-1485202
scaffold00001:1642178-1642363	scaffold00001_pilon:1626475-1627333	NNNNNNNNNNNNNNNNNNNNNNNNNNNNNNNNNNNNNNNNNNNNNNNNNNNNNNNNNNNNNNNNNNNNNNNNNNNNNNNNNNNNNNNNNNNNNNNNNNNNNNNNNNNNNNNNNNNNNNNNNNNNNNNNNNNNNNNNNNNNNNNNNNNNNNNNNNNNNNNNNNNNNNNNNNNNNNNNNNNNNNNNNN	TGCAGCTGGCTCGGCATCTGGGGTTGGAGGTGTTCGCGACCGCGAGCAAGGGTAAGTGGGACACCTTGCGCGCCATGGGCTTTGACGACGACCACATATCCGATTCACGTAGCCTAGAGTTCGAGGACAAGTTCCGCGCGGCCACTGGCGGTCGAGGGTTCGACGTGGTGTTGGACTCGCTGGCCGGTGAATTCGTGGATGCGTCGCTGCGTCTGGTGGCACCGGGTGGGGTGTTCTTGGAGATGGGCAAGACCGACATCCGCGACCCCGGCGTGATCGCCCAGCAGTACCCGGGCGTGCGCTACCGCGCCTTCGACCTATTCGAAGCGGGACCGGACCGCATTGCGCAGATCCTTGCCGAGCTCGCCACGCTGTTCGGCGATGGGGTGCTGCGGCCGT…	PartialFill	-2317069	Correct	Perfect	TBFG_12085	hypothetical protein	2316211-2317069
scaffold00001:1751529	scaffold00001_pilon:1736499	G	T	SNP	-2205568	Correct	Perfect	TBFG_11974	hypothetical protein	2205568
scaffold00001:1751555	scaffold00001_pilon:1736525	C	T	SNP	-2205542	Correct	Perfect	TBFG_11974	hypothetical protein	2205542
scaffold00001:1751621	scaffold00001_pilon:1736591	C	T	SNP	-2205476	Correct	Perfect	TBFG_11974	hypothetical protein	2205476
scaffold00001:1783366-1783515	scaffold00001_pilon:1768336	AGGGTTAGGCCCGTTTACGGTGTTCCCGGATGGCTACTCACTTCCGGCAATCCCGTTGGGTATTGATGTGGGCGGAGGGTTAGGCCCGTTTACGGTGTTCCCGGATGGCTACTCACTTCCGGCAATCCCGTTGGGTATTGATGTGGGCGG	.	BreakFix	-2173652	No worse	no worse? Pilon took away 150 rather than 75? Surprised no TR	TBFG_11946	PPE family protein	2173652-2173652
scaffold00001:1923038-1923040	scaffold00001_pilon:1907858	TGG	.	Del	-2034120	Correct	Perfect	TBFG_11817	PPE family protein	2034120-2034120
scaffold00001:1951717-1955581	scaffold00001_pilon:1936534-1940398	NNNNNNNNNNNNNNNNNNNNNNNNNNNNNNNNNNNNNNNNNNNNNNNNNNNNNNNNNNNNNNNNNNNNNNNNNNNNNNNNNNNNNNNNNNNNNNNNNNNNNNNNNNNNNNNNNNNNNNNNNNNNNNNNNNNNNNNNNNNNNNNNNNNNNNNNNNNNNNNNNNNNNNNNNNNNNNNNNNNNNNNNNNNNNNNNNNNNNNNNNNNNNNNNNNNNNNNNNNNNNNNNNNNNNNNNNNNNNNNNNNNNNNNNNNNNNNNNNNNNNNNNNNNNNNNNNNNNNNNNNNNNNNNNNNNNNNNNNNNNNNNNNNNNNNNNNNNNNNNNNNNNNNNNNNNNNNNNNNNNNNNNNNNNNNNNNNNNNNNNNNNNNNNNNNNNNNNNNNNNNNNNNNNNNNNNNNNNNNN…	ACCGGCGGGACGTCGCCGCAGTACTGGTAGAGGCGGCGATGGTTGAACCAGTCGACCCAGCGCGCGGTGGCCAACTCGACATCCTCGATGGACCGCCAGGGCTTGCCGGGTTTGATCAGCTCGGTCTTGTATAGGCCGTTGATCGTCTCGGCTAGTGCATTGTCATAGGAGCTTCCGACCGCTCCGACCGACGGTTGGATGCCTGCCTCGGCGAGCCGCTCGCTGAACCGGATCGATGTGTACTGAGATCCCCTATCCGTATGGTGGATAACGTCTTTCAGGTCGAGTACGCCTTCTTGTTGGCGGGTCCAGATGGCTTGCTCGATCGCGTCGAGGACCATGGAGGTGGCCATCGTGGAAGCGACCCGCCAGCCCAGGATCCTGCGAGCGTAGGCGTCG…	PartialFill	-2005444	Correct	1986 L & 1274 R perfect	TBFG_11792 & TBFG_11792	transposase(s)	2001580-2005444
scaffold00001:1959786-1965975	scaffold00001_pilon:1944603-1945771	NNNNNNNNNNNNNNNNNNNNNNNNNNNNNNNNNNNNNNNNNNNNNNNNNNNNNNNNNNNNNNNNNNNNNNNNNNNNNNNNNNNNNNNNNNNNNNNNNNNNNNNNNNNNNNNNNNNNNNNNNNNNNNNNNNNNNNNNNNNNNNNNNNNNNNNNNNNNNNNNNNNNNNNNNNNNNNNNNNNNNNNNNNNNNNNNNNNNNNNNNNNNNNNNNNNNNNNNNNNNNNNNNNNNNNNNNNNNNNNNNNNNNNNNNNNNNNNNNNNNNNNNNNNNNNNNNNNNNNNNNNNNNNNNNNNNNNNNNNNNNNNNNNNNNNNNNNNNNNNNNNNNNNNNNNNNNNNNNNNNNNNNNNNNNNNNNNNNNNNNNNNNNNNNNNNNNNNNNNNNNNNNNNNNNNNNNNNNNNN…	GACCGGCGGGACGTCGCCGCAGTACTGGTAGAGGCGGCGATGGTTGAACCAGTCGACCCAGCGCGCGGTGGCCAACTCGACATCCTCGATGGACCGCCAGGGCTTGCCGGGTTTGATCAGCTCGGTCTTGTATAGGCCGTTGATCGTCTCGGCTAGTGCATTGTCATAGGAGCTTCCGACCGCTCCGACCGACGGTTGGATGCCTGCCTCGGCGAGCCGCTCGCTGAACCGGATCGATGTGTACTGAGATCCCCTATCCGTATGGTGGATAACGTCTTTCAGGTCGAGTACGCCTTCTTGTTGGCGGGTCCAGATGGCTTGCTCGATCGCGTCGAGGACCATGGAGGTGGCCATCGTGGAAGCGACCCGCCAGCCCAGGATCCTGCGAGCGTAGGCGTC…	ClosedGap	-1998623	Correct	Perfect	TBFG_11784 & TBFG_11785	transposase(s)	1997455-1998623
scaffold00001:1970743-1971522	scaffold00001_pilon:1950539-1950777	NNNNNNNNNNNNNNNNNNNNNNNNNNNNNNNNNNNNNNNNNNNNNNNNNNNNNNNNNNNNNNNNNNNNNNNNNNNNNNNNNNNNNNNNNNNNNNNNNNNNNNNNNNNNNNNNNNNNNNNNNNNNNNNNNNNNNNNNNNNNNNNNNNNNNNNNNNNNNNNNNNNNNNNNNNNNNNNNNNNNNNNNNNNNNNNNNNNNNNNNNNNNNNNNNNNNNNNNNNNNNNNNNNNNNNNNNNNNNNNNNNNNNNNNNNNNNNNNNNNNNNNNNNNNNNNNNNNNNNNNNNNNNNNNNNNNNNNNNNNNNNNNNNNNNNNNNNNNNNNNNNNNNNNNNNNNNNNNNNNNNNNNNNNNNNNNNNNNNNNNNNNNNNNNNNNNNNNNNNNNNNNNNNNNNNNNNNNNNNN…	CATCGATCCGGTTCAGCGAGCGGCTCGCCGAGGCAGGCATCCAACCGTCGGTCGGAGCGGTCGGAAGCTCCTATGACAATGCACTAGCCGAGACGATCAACGGCCTATACAAGACCGAGCTGATCAAACCCGGCAAGCCCTGGCGGTCCATCGAGGATGTCGAGTTGGCCACCGCGCGCTGGGTCGACTGGTTCAACCATCGCCGCCTCTACCAGTACTGCGGCGACGTCCCGCCGGTC	ClosedGap	-1992687	Correct	Perfect	TBFG_11780	transposase	1992449-1992687
scaffold00001:1979617-1979751	scaffold00001_pilon:1958872-1959539	NNNNNNNNNNNNNNNNNNNNNNNNNNNNNNNNNNNNNNNNNNNNNNNNNNNNNNNNNNNNNNNNNNNNNNNNNNNNNNNNNNNNNNNNNNNNNNNNNNNNNNNNNNNNNNNNNNNNNNNNNNNNNNNNNNNNNNN	GTGAGCGGGCGGTGCGGATGGTCGCAGAGATCCGCGGTCAGCACGATTCGGAGTGGGCAGCGATCAGTGAGGTCGCCCGTCTACTTGGTGTTGGCTGCGCGGAGACGGTGCGTAAGTGGGTGCGCCAGGCGCAGGTCGATGCCGGCGCACGGCCCGGGACCACGACCGAAGAATCCGCTGAGCTGAAGCGCTTGCGGCGGGACAACGCCGAATTGCGAAGGGCGAACGCGATTTTAAAGACCGCGTCGGCTTTCTTCGCGGCCGAGCTCGACCGGCCAGCACGCTAATTACCCGGTTCATCGCCGATCATCAGGGCCACCGCGAGGGCCCCGATGGTTTGCGGTGGGGTGTCGAGTCGATCTGCACACAGCTGACCGAGCTGGGTGTGCCGATCGCCCC…	PartialFill	-1984354	Correct	967 L & 291 R perfect	TBFG_11774	transposase	1983687-1984354
scaffold00001:2017173-2018732	scaffold00001_pilon:1996961-1998129	NNNNNNNNNNNNNNNNNNNNNNNNNNNNNNNNNNNNNNNNNNNNNNNNNNNNNNNNNNNNNNNNNNNNNNNNNNNNNNNNNNNNNNNNNNNNNNNNNNNNNNNNNNNNNNNNNNNNNNNNNNNNNNNNNNNNNNNNNNNNNNNNNNNNNNNNNNNNNNNNNNNNNNNNNNNNNNNNNNNNNNNNNNNNNNNNNNNNNNNNNNNNNNNNNNNNNNNNNNNNNNNNNNNNNNNNNNNNNNNNNNNNNNNNNNNNNNNNNNNNNNNNNNNNNNNNNNNNNNNNNNNNNNNNNNNNNNNNNNNNNNNNNNNNNNNNNNNNNNNNNNNNNNNNNNNNNNNNNNNNNNNNNNNNNNNNNNNNNNNNNNNNNNNNNNNNNNNNNNNNNNNNNNNNNNNNNNNNNNN…	GAGCGGGCGGTGCGGATGGTCGCAGAGATCCGCGGTCAGCACGATTCGGAGTGGGCAGCGATCAGTGAGGTCGCCCGTCTACTTGGTGTTGGCTGCGCGGAGACGGTGCGTAAGTGGGTGCGCCAGGCGCAGGTCGATGCCGGCGCACGGCCCGGGACCACGACCGAAGAATCCGCTGAGCTGAAGCGCTTGCGGCGGGACAACGCCGAATTGCGAAGGGCGAACGCGATTTTAAAGACCGCGTCGGCTTTCTTCGCGGCCGAGCTCGACCGGCCAGCACGCTAATTACCCGGTTCATCGCCGATCATCAGGGCCACCGCGAGGGCCCCGATGGTTTGCGGTGGGGTGTCGAGTCGATCTGCACACAGCTGACCGAGCTGGGTGTGCCGATCGCCCCAT…	ClosedGap	-1947252	Correct	Perfect	TBFG_11739 & TBFG_11740	transposase(s)	1946084-1947252
scaffold00001:2622670	scaffold00001_pilon:2602067	C	G	SNP	-1343505	Correct	Perfect	TBFG_11220	PPE family protein	1343505-1343505
scaffold00001:2685980	scaffold00001_pilon:2665377	A	G	SNP	-1280196	Correct	Perfect	TBFG_11025	hypothetical protein	1280196
scaffold00001:3331364	scaffold00001_pilon:3310761	A	T	SNP	-634655	Correct	Perfect	TBFG_10549	conserved membrane protein	634655-634655
scaffold00001:3382027	scaffold00001_pilon:3361424	C	.	Del	-583887	Correct	Perfect	intergenic	NO GENE {falls between two component system sensor histidine kinase senX3 (TBFT_10498) and two component system sensor transduction protein regX3 (TBFT_10499)}	583887-583887
scaffold00001:3811160	scaffold00001_pilon:3790556	C	T	SNP	-154507	Correct	Perfect	intergenic	NO GENE (falls between TBFG_10127 & TBFG_10128	154507
scaffold00001:3860752	scaffold00001_pilon:3840148	C	T	SNP	-104915	Correct	Perfect	TBFG_10096	hypothetical protein	104915
scaffold00001:4323907-4324128	scaffold00001_pilon:4303303	TGGGGTGATTGCCTGGCTCCTCCTCGGCCCGTTTTGCGGGCCGCATTGTCGCCAGGCGCGGGGTTTGCGATCGCCACGGGGCTGATGGTGGCGACCCGCTGCACCCGGCTCTGGGGTGATTGCCTGGCTCCTCCTCGGCCCGTTTTGCGGGCCGCATTGTCGCCAGGCGCGGGGTTTGCGATCGCCACGGGGCTGATGGTGGCGACCCGCTGCACCCGGCTC	.	BreakFix	-4065750	Correct	1 SNP error in L flank	TBFG_13643	hypothetical arginine and proline rich protein	4065750-4065750
scaffold00001:4425862-4425871	scaffold00001_pilon:4405036-4405491	NNNNNNNNNN	CCGGGGGACTACGCCCAAGTCGAGGAGGACGGCACGGTCACCATGCTGGGTCGTGGCTCGGTGTCGATCAACAGCGGCGGCGAGAAGGTCTACCCCGAAGAGGTCGAGGCCGCTTTGAAGGGGCATCCCGACGTGTTCGACGCTCTGGTGGTCGGGGTGCCCGATCCGCGTTACGGCCAGCAGGTGGCCGCCGTGGTGCAGGCCCGGCCGGGTTGTCGGCCGTCGTTGGCCGAGTTGGACTCGTTCGTGCGCTCCGAGATCGCGGGCTACAAAGTGCCGCGCAGTCTGTGGTTTGTCGACGAGGTGAAGNNNNNNNNNNGTTGCCGTTGCCGCCGTTGCCGGCGTCGCCGGCGTCGCCGCCAGCGCCGCCGTTGCCGCCGGTGCCGCCGCCGCTGCCCC…	PartialFill	-3964017	Correct	608 L & 438 R perfect	TBFG_13548	fatty-acid-CoA ligase fadD19	3963562-3964017
scaffold00004:48	scaffold00004_pilon:48	G	C	SNP	3858054	Correct	by IGV	intergenic	NO GENE {falls between transposase (TBFT_13460) & hypothetical protein (TBFT_13461)}	3858054-3858054
scaffold00004:58	scaffold00004_pilon:58	G	.	Del	3858064	Correct	by IGV	TBFG_13461	hypothetical protein	3858064-3858064
scaffold00004:59	scaffold00004_pilon:58	G	T	SNP	3858064	Correct	by IGV	TBFG_13461	hypothetical protein	3858064-3858064
scaffold00004:62	scaffold00004_pilon:61	A	C	SNP	3858067	Correct	by IGV	TBFG_13461	hypothetical protein	3858067-3858067
scaffold00004:64	scaffold00004_pilon:63	G	T	SNP	3858069	Correct	by IGV	TBFG_13461	hypothetical protein	3858069-3858069
